# Supplementary material for: PHDcleav: a SVM based method for predicting human Dicer cleavage sites using sequence and secondary structure of miRNA precursors
Source: PubMed Central journal article supplement (PMC3851333; doi:10.1186/1471-2105-14-s14-s9), 2013-10-09
Supplement: 1471-2105-14-S14-S9-S1.pdf [file 1471-2105-14-S14-S9-S1.pdf]

# **PHDcleav: A SVM based method for predicting human Dicer cleavage sites using sequence and secondary structure of miRNA precursors**

**Firoz Ahmed, Rakesh Kaundal and Gajendra PS Raghava**

## **Additional file 1**

### **Methods**

#### **Datasets**

Training datasets contain 555 patterns of Dicer cleavage site (positive class) and 555 patterns of Dicer non-cleavage sites (negative class). We used non-redundant five-fold cross validation technique to evaluate the models. Many miRNA precursors are very similar to each other thus randomly dividing the pattern into 5 sets generates positive bias in the SVMs estimated performance. Therefore, in this study we placed all similar sequences, according to miFam.dat of miRBase into similar set.

Independent testing dataset contain 135 patterns of Dicer cleavage and 135 patterns of Dicer non-cleavage.

#### **Dicer cleavage sites**

We considered the 3' end of mature miRNA generated from 5' arm and 5' end of mature miRNA generated from 3' arm as Dicer cleavage site. As the Dicer generally making 2 nt overhang at 3' end, in case of miRNA generated from only 3' arm we defined the Dicer cleavage site at 5' arm with the help of 3' arm. Similarly when the mature miRNA generated from only 5' arm the Dicer cleavage site at 3' arm is defined using 2 nt overhang in the structure.

#### **Sequence pattern of Dicer cleavage site**

We used the various length of Dicer cleavage pattern 8 nt, 10 nt, 12 nt and 14 nt to check the performance. Each pattern contains Dicer cleavage site at the center. Nucleotide

composition was taken as an input feature for SVM. In case of composition, vector size for SVM remains the same for different length of pattern like 4 dimensions for mononucleotide of 14 nt as well as 12 nt. While in case of binary pattern, vector size varied according to the length of Dicer pattern. Like 48 dimension for 12nt, and 56 dimensions for 14 nt.

### **Structure pattern of Dicer cleavage site**

Here, in addition to the sequence pattern, we also included the information of their complementary base. In this case, a 14 nt pattern will contain 28 base (14 additional base from complementary strand) and thus represented by a vector of 112 dimension. We used two different methods for secondary structure: (1) structure from miRNA.str file of miRBase 13., and (2) generated the secondary structure of miRNA hairpin by using quikfold server (version 3.0 RNA rules) available at <http://mfold.rna.albany.edu/?q=DINAMelt/Quickfold> and structure having lowest free energy were taken.

## Description of PHDcleav web server

Based on this study, the best model was used to develop the web server, PHDcleav (<http://www.imtech.res.in/raghava/phdcleav/>) for predicting Dicer cleavage site at 5' arm of human pre-miRNA. This is a user-friendly server developed on SUN server under Solaris environment using HTML, PERL and CGI-PERL.

*Input:* The input sequence for predicting Dicer cleavage site in pre-miRNA is a one-letter code nucleotide (A, C, G, U) in simple format. More than one sequence is separated by semicolon (;). The sequence can be pasted in the provided text area or can be uploaded through a file.

*Options:* The threshold is used to discriminate the dicer processing sites. The threshold should be chosen as 0.2, but user can vary the threshold score between -1.0 to 1.0.

*Output:* This algorithm extracts 14 nt long sliding structure pattern having cleavage site at the center and binary pattern generated. It checks the score of cleavage site from 17 to hairpin-loop on 5' arm of pre-miRNA. This is because lengths of miRNA vary from 17 nt to 27 nt (miRBase 13). If the score of the sequence is more than the threshold, the middle of the 14 nt is predicted as Dicer cleavage sites. The results may generate several cleavage sites with different SVM scores at a given site; highest score is considered as the most probable cleavage site. Each of the results display format firstly provides name of sequence, length of sequence, structure pattern having cleavage site at center followed by position of Dicer processing sites. One pre-miRNA sequence may generate different patterns and their corresponding SVM score. The secondary structure of each hairpin could be downloaded by clicking at the corresponding name.

(A) has-mir-200c

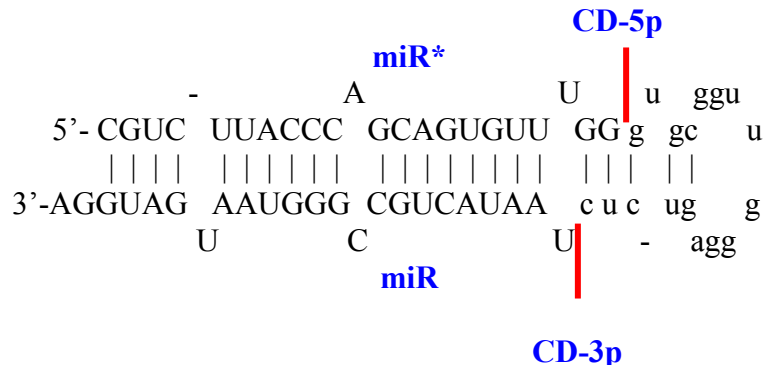

(B) Sequence of CP-5p: UG UUUGGgugcggg

+1 1:0.00 2:7.14 3:50.00 4:42.86

+1 1:0 2:0 3:0 4:1 5:0 6:0 7:1 8:0 ..... 49:0 50:0 51:1 52:0 53:0 54:0 55:0 56:1

(C) Sequence of nCP-5p: CUUACCCAGCAGU

-1 1:21.43 2:35.71 3:14.29 4:21.43

-1 1:0 2:1 3:0 4:0 5:0 6:0 7:0 8:0 ..... 49:0 50:0 51:1 52:0 53:0 54:0 55:0 56:1

(D) Structure of CP-5p:

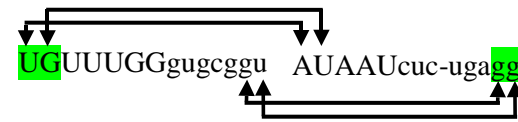

+1 1:14.29 2:10.71 3:35.71 4:35.71

+1 1:0 2:0 3:0 4:1 5:0 6:0 7:1 8:0 ..... 105:0 106:0 107:1 108:0 109:0 110:0 111:1 112:0

(E) Structure of nCP-5p: CUUACCCAGCAGU GUA AUGGCCGUCA

-1 1:21.43 2:28.57 3:25.00 4:21.43

-1 1:0 2:1 3:0 4:0 5:0 6:0 7:0 8:0.... 105:0 106:1 107:0 108:0 109:1 110:0 111:0 112:0

**Figure S1:** Schematic diagram of pre-miRNA, hsa-mir-200c, taken from miRNA.str of miRBase and patterns of Dicer cleavage site at 5' arm of hairpin. (A) miR\* derived from 5' arm and miR derived from 3' arm of hairpin, bases presented in miR/miR\* are represented in capital letter. CD-5p and CD-3p are cleavage site of Dicer at 5' and 3' arm respectively. (B) Sequence of CP-5p cleavage pattern of 14 nucleotides having cleavage

site CD-5p at centre. Following each cleavage pattern, feature of mononucleotide, and binary of the pattern used as input feature for SVM are given. (C) Sequence of nCP-5p non-cleavage pattern of 14 nucleotide derived from 5' arm of pre-miRNA after omitting six nucleotide from CD-5p. (D) Structure of CP-5p cleavage pattern of 14 nucleotides having cleavage site CD-5p at centre and its partially complementary strand. Base of 5' arm corresponding to 3' arm are indicated with arrows. The pattern of 14+14 is used to generate binary pattern. (E) Structure of nCP-5p non-cleavage pattern of 14 nucleotide derived from 5' arm and corresponding base of 3' arm. Mononucleotide having 4, sequence binary pattern having 56, and structure binary pattern having 112 dimensional vector. +1 is the class for cleavage pattern and -1 is the class for non-cleavage pattern. Binary pattern is represented only for highlighted nucleotides.

(A) *has-mir-200c*

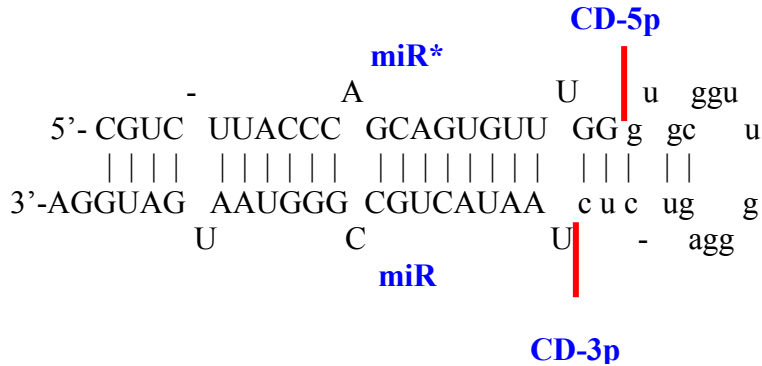

(B) Sequence of CP-3p: UCAUAAUcuc-uga

+1 1:28.57 2:21.43 3:7.14 4:35.71

+1 1:0 2:0 3:0 4:1 5:0 6:1 7:0 8:0 ..... 49:0 50:0 51:1 52:0 53:1 54:0 55:0 56:0

(C) Sequence of nCP-3p: UAGUAAUGGGCCGU

-1 1:21.43 2:14.29 3:35.71 4:28.57

-1 1:0 2:0 3:0 4:1 5:1 6:0 7:0 8:0..... 49:0 50:0 51:1 52:0 53:0 54:0 55:0 56:1

(D) Structure of CP-3p: AGUGUUUGGgugcgUCAUAAUcuc-uga

+1 1:17.86 2:14.29 3:28.57 4:35.71

+1 1:1 2:0 3:0 4:0 5:0 6:0 7:1 8:0 ..... 105:0 106:0 107:1 108:0 109:1 110:0 111:0 112:0

(E) Structure of nCP-3p: GUC-UUACCCAGCAUAGUAAUGGGCCGU

-1 1:21.43 2:25.00 3:25.00 4:25.00

-1 1:0 2:0 3:1 4:0 5:0 6:0 7:0 8:1..... 105:0 106:0 107:1 108:0 109:0 110:0 111:0 112:1

**Figure S2:** Schematic diagram of pre-miRNA, *hsa-mir-200c*, taken from *miRNA.str* of *miRBase* and patterns of Dicer cleavage site at 3' arm of hairpin. (A) miR\* derived from 5' arm and miR derived from 3 arm of hairpin, bases presented in miR/miR\* are represented in capital letter. CD-5p and CD-3p are cleavage site of Dicer at 5' and 3' arm respectively. (B) Sequence of CP-3p cleavage pattern of 14 nucleotides having cleavage site CD-3p at centre. Following each cleavage pattern, feature of mononucleotide and binary of the pattern used as input feature for SVM are given. (C) Sequence of nCP-3p non-cleavage pattern of 14 nucleotide derived from 3' arm of pre-miRNA after omitting

six nucleotide from CD-3p. (D) Structure of CP-3p cleavage pattern of 14 nucleotides having cleavage site CD-3p at centre and its partially complementary strand. The pattern of 14+14 is used to generate binary pattern. (E) Structure of nCP-3p non-cleavage pattern of 14 nucleotide derived from 3' arm and corresponding base of 5' arm. Mononucleotide having 4, sequence binary pattern having 56, and structure binary pattern having 112 dimensional vector. +1 is the class for cleavage pattern and -1 is the class for non-cleavage pattern. Binary pattern is represented only for highlighted nucleotides.

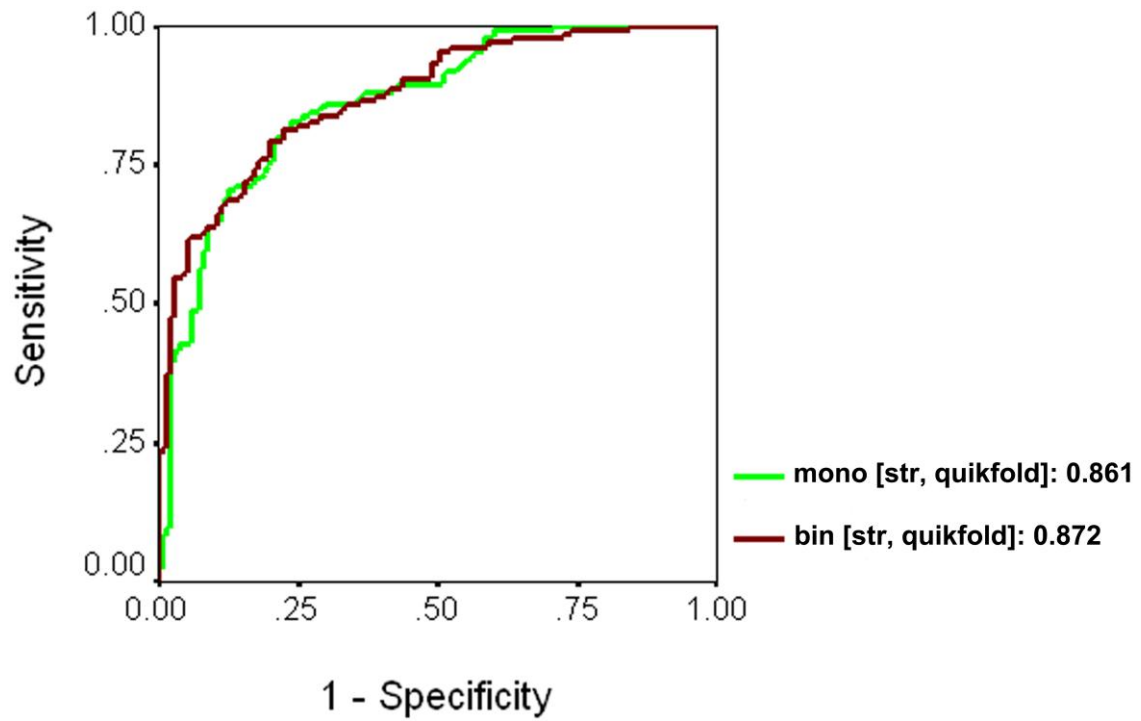

**Figure S3:** Performance of two best SVM models for Dicer cleavage site at 5p arm (CD-5p) on an independent dataset containing 135 pre-miRNA. The value indicates AUC for the corresponding model.



**Table S1:** Performance of SVM-based model for Dicer cleavage site at 5p arm (structure of CP-5p) developed using **binary pattern** feature. SVM<sup>light</sup> parameters: g:0.01, c:8, j:2.

| Th         | TP         | TN         | FP        | FN        | Sn           | Sp           | Ac           | Mc          |
|------------|------------|------------|-----------|-----------|--------------|--------------|--------------|-------------|
| -1         | 541        | 177        | 378       | 14        | 97.48        | 31.89        | 64.68        | 0.39        |
| -0.9       | 538        | 195        | 360       | 17        | 96.94        | 35.14        | 66.04        | 0.41        |
| -0.8       | 536        | 232        | 323       | 19        | 96.58        | 41.80        | 69.19        | 0.46        |
| -0.7       | 531        | 266        | 289       | 24        | 95.68        | 47.93        | 71.80        | 0.50        |
| -0.6       | 524        | 293        | 262       | 31        | 94.41        | 52.79        | 73.60        | 0.52        |
| -0.5       | 519        | 330        | 225       | 36        | 93.51        | 59.46        | 76.49        | 0.56        |
| -0.4       | 515        | 351        | 204       | 40        | 92.79        | 63.24        | 78.02        | 0.59        |
| -0.3       | 510        | 384        | 171       | 45        | 91.89        | 69.19        | 80.54        | 0.63        |
| -0.2       | 501        | 406        | 149       | 54        | 90.27        | 73.15        | 81.71        | 0.64        |
| -0.1       | 495        | 430        | 125       | 60        | 89.19        | 77.48        | 83.33        | 0.67        |
| 0          | 487        | 449        | 106       | 68        | 87.75        | 80.90        | 84.32        | 0.69        |
| 0.1        | 480        | 470        | 85        | 75        | 86.49        | 84.68        | 85.59        | 0.71        |
| <b>0.2</b> | <b>473</b> | <b>484</b> | <b>71</b> | <b>82</b> | <b>85.23</b> | <b>87.21</b> | <b>86.22</b> | <b>0.72</b> |
| 0.3        | 457        | 496        | 59        | 98        | 82.34        | 89.37        | 85.86        | 0.72        |
| 0.4        | 443        | 506        | 49        | 112       | 79.82        | 91.17        | 85.50        | 0.71        |
| 0.5        | 419        | 516        | 39        | 136       | 75.50        | 92.97        | 84.23        | 0.70        |
| 0.6        | 400        | 523        | 32        | 155       | 72.07        | 94.23        | 83.15        | 0.68        |
| 0.7        | 377        | 528        | 27        | 178       | 67.93        | 95.14        | 81.53        | 0.66        |
| 0.8        | 358        | 536        | 19        | 197       | 64.50        | 96.58        | 80.54        | 0.64        |
| 0.9        | 343        | 538        | 17        | 212       | 61.80        | 96.94        | 79.37        | 0.63        |
| 1          | 328        | 542        | 13        | 227       | 59.10        | 97.66        | 78.38        | 0.62        |

Th: Threshold, Sn: sensitivity, Sp: specificity, Ac: accuracy, Mc: Matthews correlation coefficient.

**Table S2:** Performance of Dicer cleavage site at 5p arm on independent dataset of 135 pre-miRNA sequences on SVM model (Table S1) trained on 555 pre-miRNA sequences using binary pattern feature.

| <b>Th</b>  | <b>TP</b>  | <b>TN</b>  | <b>FP</b> | <b>FN</b> | <b>Sn</b>    | <b>Sp</b>    | <b>Ac</b>    | <b>Mc</b>   |
|------------|------------|------------|-----------|-----------|--------------|--------------|--------------|-------------|
| -1         | 134        | 32         | 103       | 1         | 99.26        | 23.70        | 61.48        | 0.35        |
| -0.9       | 133        | 37         | 98        | 2         | 98.52        | 27.41        | 62.96        | 0.37        |
| -0.8       | 132        | 46         | 89        | 3         | 97.78        | 34.07        | 65.93        | 0.41        |
| -0.7       | 130        | 56         | 79        | 5         | 96.30        | 41.48        | 68.89        | 0.45        |
| -0.6       | 129        | 65         | 70        | 6         | 95.56        | 48.15        | 71.85        | 0.50        |
| -0.5       | 123        | 69         | 66        | 12        | 91.11        | 51.11        | 71.11        | 0.46        |
| -0.4       | 122        | 76         | 59        | 13        | 90.37        | 56.30        | 73.33        | 0.50        |
| -0.3       | 119        | 80         | 55        | 16        | 88.15        | 59.26        | 73.70        | 0.50        |
| -0.2       | 116        | 86         | 49        | 19        | 85.93        | 63.70        | 74.81        | 0.51        |
| -0.1       | 114        | 91         | 44        | 21        | 84.44        | 67.41        | 75.93        | 0.53        |
| 0          | 112        | 96         | 39        | 23        | 82.96        | 71.11        | 77.04        | 0.54        |
| 0.1        | 110        | 105        | 30        | 25        | 81.48        | 77.78        | 79.63        | 0.59        |
| <b>0.2</b> | <b>103</b> | <b>108</b> | <b>27</b> | <b>32</b> | <b>76.30</b> | <b>80.00</b> | <b>78.15</b> | <b>0.56</b> |
| 0.3        | 98         | 112        | 23        | 37        | 72.59        | 82.96        | 77.78        | 0.56        |
| 0.4        | 94         | 115        | 20        | 41        | 69.63        | 85.19        | 77.41        | 0.55        |
| 0.5        | 93         | 118        | 17        | 42        | 68.89        | 87.41        | 78.15        | 0.57        |
| 0.6        | 90         | 120        | 15        | 45        | 66.67        | 88.89        | 77.78        | 0.57        |
| 0.7        | 85         | 124        | 11        | 50        | 62.96        | 91.85        | 77.41        | 0.57        |
| 0.8        | 84         | 127        | 8         | 51        | 62.22        | 94.07        | 78.15        | 0.59        |
| 0.9        | 78         | 128        | 7         | 57        | 57.78        | 94.81        | 76.30        | 0.57        |
| 1          | 72         | 131        | 4         | 63        | 53.33        | 97.04        | 75.19        | 0.56        |

**Table S3:** Performance of SVM-based model (*Model 1*) for Dicer cleavage site at 5p arm (structure of CP-5p) developed using extended binary pattern feature. SVM<sup>light</sup> parameters: g:0.01, c:8, j:1.

| Th       | TP         | TN         | FP        | FN        | Sn           | Sp           | Ac           | sd(Ac)      | Mc          | sd(Mc)       |
|----------|------------|------------|-----------|-----------|--------------|--------------|--------------|-------------|-------------|--------------|
| -1       | 531        | 260        | 295       | 24        | 95.68        | 46.85        | 71.26        | 3.03        | 0.49        | 0.047        |
| -0.9     | 525        | 292        | 263       | 30        | 94.59        | 52.61        | 73.60        | 2.81        | 0.52        | 0.04         |
| -0.8     | 521        | 333        | 222       | 34        | 93.87        | 60.00        | 76.94        | 2.52        | 0.57        | 0.043        |
| -0.7     | 517        | 351        | 204       | 38        | 93.15        | 63.24        | 78.20        | 1.95        | 0.59        | 0.036        |
| -0.6     | 513        | 376        | 179       | 42        | 92.43        | 67.75        | 80.09        | 1.75        | 0.62        | 0.034        |
| -0.5     | 507        | 393        | 162       | 48        | 91.35        | 70.81        | 81.08        | 2.49        | 0.64        | 0.052        |
| -0.4     | 496        | 422        | 133       | 59        | 89.37        | 76.04        | 82.70        | 2.58        | 0.66        | 0.055        |
| -0.3     | 488        | 441        | 114       | 67        | 87.93        | 79.46        | 83.69        | 2.03        | 0.68        | 0.042        |
| -0.2     | 482        | 460        | 95        | 73        | 86.85        | 82.88        | 84.86        | 2.18        | 0.70        | 0.043        |
| -0.1     | 476        | 476        | 79        | 79        | 85.77        | 85.77        | 85.77        | 2.25        | 0.72        | 0.042        |
| <b>0</b> | <b>468</b> | <b>491</b> | <b>64</b> | <b>87</b> | <b>84.32</b> | <b>88.47</b> | <b>86.40</b> | <b>1.29</b> | <b>0.73</b> | <b>0.027</b> |
| 0.1      | 457        | 499        | 56        | 98        | 82.34        | 89.91        | 86.13        | 1.33        | 0.72        | 0.027        |
| 0.2      | 445        | 508        | 47        | 110       | 80.18        | 91.53        | 85.86        | 1.98        | 0.72        | 0.036        |
| 0.3      | 430        | 516        | 39        | 125       | 77.48        | 92.97        | 85.23        | 3.57        | 0.71        | 0.062        |
| 0.4      | 415        | 521        | 34        | 140       | 74.77        | 93.87        | 84.32        | 3.84        | 0.70        | 0.063        |
| 0.5      | 404        | 523        | 32        | 151       | 72.79        | 94.23        | 83.51        | 4.26        | 0.69        | 0.069        |
| 0.6      | 389        | 529        | 26        | 166       | 70.09        | 95.32        | 82.70        | 4.15        | 0.68        | 0.066        |
| 0.7      | 372        | 535        | 20        | 183       | 67.03        | 96.40        | 81.71        | 3.8         | 0.66        | 0.059        |
| 0.8      | 350        | 538        | 17        | 205       | 63.06        | 96.94        | 80.00        | 4.57        | 0.64        | 0.073        |
| 0.9      | 331        | 542        | 13        | 224       | 59.64        | 97.66        | 78.65        | 4.53        | 0.62        | 0.07         |
| 1        | 316        | 547        | 8         | 239       | 56.94        | 98.56        | 77.75        | 4.48        | 0.61        | 0.064        |

Th: Threshold, Sn: sensitivity, Sp: specificity, Ac: accuracy, Mc: Matthews correlation coefficient, sd: standard deviation

**Table S4:** Performance of Dicer cleavage site at 5p arm on independent dataset of 135 pre-miRNA sequences on SVM model (Table S3) trained on 555 pre-miRNA sequences using extended binary pattern feature (*Model 1*).

| <b>Th</b> | <b>TP</b>  | <b>TN</b>  | <b>FP</b> | <b>FN</b> | <b>Sn</b>    | <b>Sp</b>    | <b>Ac</b>    | <b>Mc</b>   |
|-----------|------------|------------|-----------|-----------|--------------|--------------|--------------|-------------|
| -1        | 131        | 54         | 81        | 4         | 97.04        | 40.00        | 68.52        | 0.45        |
| -0.9      | 129        | 65         | 70        | 6         | 95.56        | 48.15        | 71.85        | 0.50        |
| -0.8      | 124        | 71         | 64        | 11        | 91.85        | 52.59        | 72.22        | 0.48        |
| -0.7      | 123        | 77         | 58        | 12        | 91.11        | 57.04        | 74.07        | 0.51        |
| -0.6      | 120        | 82         | 53        | 15        | 88.89        | 60.74        | 74.81        | 0.52        |
| -0.5      | 117        | 89         | 46        | 18        | 86.67        | 65.93        | 76.30        | 0.54        |
| -0.4      | 116        | 98         | 37        | 19        | 85.93        | 72.59        | 79.26        | 0.59        |
| -0.3      | 114        | 101        | 34        | 21        | 84.44        | 74.81        | 79.63        | 0.60        |
| -0.2      | 112        | 105        | 30        | 23        | 82.96        | 77.78        | 80.37        | 0.61        |
| -0.1      | 110        | 108        | 27        | 25        | 81.48        | 80.00        | 80.74        | 0.61        |
| <b>0</b>  | <b>110</b> | <b>111</b> | <b>24</b> | <b>25</b> | <b>81.48</b> | <b>82.22</b> | <b>81.85</b> | <b>0.64</b> |
| 0.1       | 103        | 115        | 20        | 32        | 76.30        | 85.19        | 80.74        | 0.62        |
| 0.2       | 99         | 118        | 17        | 36        | 73.33        | 87.41        | 80.37        | 0.61        |
| 0.3       | 96         | 121        | 14        | 39        | 71.11        | 89.63        | 80.37        | 0.62        |
| 0.4       | 91         | 123        | 12        | 44        | 67.41        | 91.11        | 79.26        | 0.60        |
| 0.5       | 89         | 126        | 9         | 46        | 65.93        | 93.33        | 79.63        | 0.62        |
| 0.6       | 82         | 128        | 7         | 53        | 60.74        | 94.81        | 77.78        | 0.59        |
| 0.7       | 77         | 131        | 4         | 58        | 57.04        | 97.04        | 77.04        | 0.59        |
| 0.8       | 74         | 132        | 3         | 61        | 54.81        | 97.78        | 76.30        | 0.58        |
| 0.9       | 71         | 132        | 3         | 64        | 52.59        | 97.78        | 75.19        | 0.56        |
| 1         | 68         | 132        | 3         | 67        | 50.37        | 97.78        | 74.07        | 0.55        |

**Table S5:** Performance of SVM-based model (*Model 2*) for Dicer cleavage site at 5p arm (structure of CP-5p) developed using **extended binary pattern** feature. Training dataset contains of 555 positive patterns and 18662 negative patterns. SVM<sup>light</sup> parameters: g:0.001, c:2, j:10.

| <b>Th</b>   | <b>TP</b>  | <b>TN</b>    | <b>FP</b>   | <b>FN</b>  | <b>Sn</b>    | <b>Sp</b>    | <b>Ac</b>    | <b>Mc</b>   |
|-------------|------------|--------------|-------------|------------|--------------|--------------|--------------|-------------|
| -1          | 449        | 13825        | 4837        | 106        | 80.90        | 74.08        | 74.28        | 0.21        |
| -0.9        | 439        | 14406        | 4256        | 116        | 79.10        | 77.19        | 77.25        | 0.22        |
| -0.8        | 417        | 14929        | 3733        | 138        | 75.14        | 80.00        | 79.86        | 0.22        |
| -0.7        | 408        | 15380        | 3282        | 147        | 73.51        | 82.41        | 82.16        | 0.24        |
| -0.6        | 388        | 15796        | 2866        | 167        | 69.91        | 84.64        | 84.22        | 0.24        |
| -0.5        | 360        | 16162        | 2500        | 195        | 64.86        | 86.60        | 85.98        | 0.24        |
| <b>-0.4</b> | <b>346</b> | <b>16496</b> | <b>2166</b> | <b>209</b> | <b>62.34</b> | <b>88.39</b> | <b>87.64</b> | <b>0.25</b> |
| -0.3        | 326        | 16796        | 1866        | 229        | 58.74        | 90.00        | 89.10        | 0.26        |
| -0.2        | 301        | 17070        | 1592        | 254        | 54.23        | 91.47        | 90.39        | 0.26        |
| -0.1        | 285        | 17285        | 1377        | 270        | 51.35        | 92.62        | 91.43        | 0.26        |
| 0           | 262        | 17518        | 1144        | 293        | 47.21        | 93.87        | 92.52        | 0.26        |
| 0.1         | 233        | 17686        | 976         | 322        | 41.98        | 94.77        | 93.25        | 0.25        |
| 0.2         | 206        | 17874        | 788         | 349        | 37.12        | 95.78        | 94.08        | 0.25        |
| 0.3         | 183        | 18021        | 641         | 372        | 32.97        | 96.57        | 94.73        | 0.24        |
| 0.4         | 164        | 18141        | 521         | 391        | 29.55        | 97.21        | 95.25        | 0.24        |
| 0.5         | 145        | 18249        | 413         | 410        | 26.13        | 97.79        | 95.72        | 0.24        |
| 0.6         | 132        | 18320        | 342         | 423        | 23.78        | 98.17        | 96.02        | 0.24        |
| 0.7         | 113        | 18385        | 277         | 442        | 20.36        | 98.52        | 96.26        | 0.22        |
| 0.8         | 93         | 18454        | 208         | 462        | 16.76        | 98.89        | 96.51        | 0.21        |
| 0.9         | 73         | 18512        | 150         | 482        | 13.15        | 99.20        | 96.71        | 0.19        |
| 1           | 60         | 18556        | 106         | 495        | 10.81        | 99.43        | 96.87        | 0.19        |

**Table S6:** Performance of SVM-based model (*Model 2<sup>balanced</sup>*) for Dicer cleavage site at 5p arm (**structure of CP-5p**) developed using **extended binary pattern** feature. Training dataset contains of 555 positive patterns and 555 negative patterns randomly selected from 18662. SVM<sup>light</sup> parameters: g:0.001, c:1, j:1.

| <b>Th</b>   | <b>TP</b>  | <b>TN</b>  | <b>FP</b>  | <b>FN</b>  | <b>Sn</b>    | <b>Sp</b>    | <b>Ac</b>    | <b>Mc</b>   |
|-------------|------------|------------|------------|------------|--------------|--------------|--------------|-------------|
| -1          | 549        | 53         | 502        | 6          | 98.92        | 9.55         | 54.23        | 0.19        |
| -0.9        | 542        | 82         | 473        | 13         | 97.66        | 14.77        | 56.22        | 0.22        |
| -0.8        | 533        | 138        | 417        | 22         | 96.04        | 24.86        | 60.45        | 0.3         |
| -0.7        | 526        | 170        | 385        | 29         | 94.77        | 30.63        | 62.70        | 0.33        |
| -0.6        | 518        | 221        | 334        | 37         | 93.33        | 39.82        | 66.58        | 0.39        |
| -0.5        | 503        | 258        | 297        | 52         | 90.63        | 46.49        | 68.56        | 0.41        |
| -0.4        | 491        | 306        | 249        | 64         | 88.47        | 55.14        | 71.80        | 0.46        |
| -0.3        | 475        | 343        | 212        | 80         | 85.59        | 61.80        | 73.69        | 0.49        |
| -0.2        | 454        | 378        | 177        | 101        | 81.8         | 68.11        | 74.95        | 0.50        |
| <b>-0.1</b> | <b>441</b> | <b>406</b> | <b>149</b> | <b>114</b> | <b>79.46</b> | <b>73.15</b> | <b>76.31</b> | <b>0.53</b> |
| 0           | 415        | 427        | 128        | 140        | 74.77        | 76.94        | 75.86        | 0.52        |
| 0.1         | 382        | 448        | 107        | 173        | 68.83        | 80.72        | 74.77        | 0.50        |
| 0.2         | 338        | 464        | 91         | 217        | 60.90        | 83.60        | 72.25        | 0.46        |
| 0.3         | 307        | 487        | 68         | 248        | 55.32        | 87.75        | 71.53        | 0.46        |
| 0.4         | 280        | 510        | 45         | 275        | 50.45        | 91.89        | 71.17        | 0.47        |
| 0.5         | 230        | 519        | 36         | 325        | 41.44        | 93.51        | 67.48        | 0.41        |
| 0.6         | 191        | 528        | 27         | 364        | 34.41        | 95.14        | 64.77        | 0.37        |
| 0.7         | 146        | 533        | 22         | 409        | 26.31        | 96.04        | 61.17        | 0.31        |
| 0.8         | 107        | 541        | 14         | 448        | 19.28        | 97.48        | 58.38        | 0.27        |
| 0.9         | 79         | 545        | 10         | 476        | 14.23        | 98.20        | 56.22        | 0.23        |
| 1           | 54         | 550        | 5          | 501        | 9.73         | 99.10        | 54.41        | 0.20        |

**Table S7:** Pre-miRNA taken from release (version 14) but not present in the last release (version 13) of miRBase and named as exclusive miRBase 14. Performance of SVM models was assessed on these 30 sequences not used in training datasets.

| Sn | Pre-miRNA    |
|----|--------------|
| 1  | hsa-mir-147  |
| 2  | hsa-mir-190b |
| 3  | hsa-mir-208a |
| 4  | hsa-mir-211  |
| 5  | hsa-mir-220a |
| 6  | hsa-mir-220b |
| 7  | hsa-mir-298  |
| 8  | hsa-mir-300  |
| 9  | hsa-mir-325  |
| 10 | hsa-mir-346  |
| 11 | hsa-mir-384  |
| 12 | hsa-mir-412  |
| 13 | hsa-mir-449c |
| 14 | hsa-mir-513b |
| 15 | hsa-mir-513c |
| 16 | hsa-mir-548q |
| 17 | hsa-mir-670  |
| 18 | hsa-mir-711  |
| 19 | hsa-mir-718  |
| 20 | hsa-mir-759  |
| 21 | hsa-mir-761  |
| 22 | hsa-mir-762  |
| 23 | hsa-mir-764  |
| 24 | hsa-mir-2114 |
| 25 | hsa-mir-2115 |
| 26 | hsa-mir-2116 |
| 27 | hsa-mir-2117 |
| 28 | hsa-mir-2276 |
| 29 | hsa-mir-2277 |
| 30 | hsa-mir-2278 |

**Table S8:** Performance of Dicer cleavage site at 5p arm on independent dataset of 30 pre-miRNA sequences (**exclusive miRBase 14**) on *Model 1* (Table S3) trained on 555 positive and 555 negative patterns using extended binary pattern feature. Top three predicted cleavages site were compared with the actual cleavage site and calculated the PSE value = (Act Pos- Pred Pos); PSE which is most close to actual cleavage site among three PSE is denoted as close PSE. PSE: position shift error, Act: actual, Pred: predicted.

| Sn                                  | Act Pos | 1 <sup>st</sup> Top score |       | 2 <sup>nd</sup> Top score |        | 3 <sup>rd</sup> Top Score |        | PSE (Act Pos- Pred Pos)   |                           |                           | Close PSE |
|-------------------------------------|---------|---------------------------|-------|---------------------------|--------|---------------------------|--------|---------------------------|---------------------------|---------------------------|-----------|
|                                     |         | Pos                       | score | Pos                       | score  | Pos                       | score  | 1 <sup>st</sup> Top score | 2 <sup>nd</sup> Top score | 3 <sup>rd</sup> Top Score |           |
| 1                                   | 28      | 30                        | 2.112 | 28                        | 1.362  | 23                        | 0.937  | 2                         | 0                         | -5                        | 0         |
| 2                                   | 31      | 33                        | 1.780 | 34                        | 1.754  | 32                        | 1.647  | 2                         | 3                         | 1                         | 1         |
| 3                                   | 31      | 32                        | 1.621 | 30                        | 1.213  | 31                        | 1.032  | 1                         | -1                        | 0                         | 0         |
| 4                                   | 47      | 51                        | 1.479 | 49                        | 1.403  | 52                        | 1.135  | 4                         | 2                         | 5                         | 2         |
| 5                                   | 43      | 42                        | 1.365 | 47                        | 1.127  | 46                        | 0.986  | -1                        | 4                         | 3                         | 1         |
| 6                                   | 31      | 31                        | 1.154 | 39                        | 0.626  | 36                        | 0.378  | 0                         | 8                         | 5                         | 0         |
| 7                                   | 34      | 38                        | 1.503 | 36                        | 0.808  | 35                        | 0.597  | 4                         | 2                         | 1                         | 1         |
| 8                                   | 29      | 36                        | 3.375 | 35                        | 2.221  | 32                        | 1.597  | 7                         | 6                         | 3                         | 3         |
| 9                                   | 38      | 38                        | 1.058 | 36                        | 0.544  | 37                        | 0.408  | 0                         | -2                        | -1                        | 0         |
| 10                                  | 42      | 44                        | 3.416 | 43                        | 2.255  | 42                        | 1.623  | 2                         | 1                         | 0                         | 0         |
| 11                                  | 32      | 39                        | 1.697 | 36                        | 1.303  | 38                        | 1.224  | 7                         | 4                         | 6                         | 4         |
| 12                                  | 40      | 40                        | 1.128 | 39                        | 0.855  | 31                        | 0.548  | 0                         | -1                        | -9                        | 0         |
| 13                                  | 41      | 42                        | 2.235 | 43                        | 1.713  | 41                        | 1.277  | 1                         | 2                         | 0                         | 0         |
| 14                                  | 35      | 35                        | 2.562 | 37                        | 2.452  | 36                        | 1.926  | 0                         | 2                         | 1                         | 0         |
| 15                                  | 35      | 35                        | 2.509 | 37                        | 2.452  | 36                        | 2.063  | 0                         | 2                         | 1                         | 0         |
| 16                                  | 29      | 49                        | 2.932 | 48                        | 2.469  | 47                        | 2.020  | 20                        | 19                        | 18                        | 18        |
| 17                                  | 39      | 46                        | 2.668 | 45                        | 2.034  | 44                        | 1.899  | 7                         | 6                         | 5                         | 5         |
| 18                                  | 32      | 32                        | 2.159 | 33                        | 1.063  | 31                        | 0.898  | 0                         | 1                         | -1                        | 0         |
| 19                                  | 32      | 25                        | 0.069 | 31                        | -0.089 | 32                        | -0.184 | -7                        | -1                        | 0                         | 0         |
| 20                                  | 45      | 43                        | 2.112 | 44                        | 1.507  | 40                        | 1.109  | -2                        | -1                        | -5                        | 1         |
| 21                                  | 28      | 25                        | 1.581 | 24                        | 1.211  | 28                        | 0.907  | -3                        | -4                        | 0                         | 0         |
| 22                                  | 35      | 36                        | 0.312 | 39                        | 0.181  | 35                        | -0.191 | 1                         | 4                         | 0                         | 0         |
| 23                                  | 32      | 40                        | 1.518 | 37                        | 1.362  | 39                        | 0.993  | 8                         | 5                         | 7                         | 5         |
| 24                                  | 34      | 35                        | 2.170 | 34                        | 1.922  | 33                        | 1.628  | 1                         | 0                         | -1                        | 0         |
| 25                                  | 42      | 42                        | 2.369 | 41                        | 2.123  | 40                        | 1.689  | 0                         | -1                        | -2                        | 0         |
| 26                                  | 34      | 36                        | 1.385 | 33                        | 1.196  | 35                        | 0.729  | 2                         | -1                        | 1                         | 1         |
| 27                                  | 35      | 35                        | 2.099 | 34                        | 1.585  | 33                        | 0.435  | 0                         | -1                        | -2                        | 0         |
| 28                                  | 37      | 40                        | 2.523 | 41                        | 1.732  | 39                        | 1.507  | 3                         | 4                         | 2                         | 2         |
| 29                                  | 40      | 41                        | 3.322 | 40                        | 1.853  | 39                        | 1.185  | 1                         | 0                         | -1                        | 0         |
| 30                                  | 37      | 44                        | 1.585 | 43                        | 0.627  | 40                        | 0.514  | 7                         | 6                         | 3                         | 3         |
| Average PSE (Position Shift Error)  |         |                           |       |                           |        |                           |        | 3.1                       | 3.13                      | 2.9                       | 1.56      |
| Average PSE (Excluding SN 18)       |         |                           |       |                           |        |                           |        | 2.52                      | 2.59                      | 2.45                      | 1         |
| # with actual position (PSE 0)      |         |                           |       |                           |        |                           |        | 8                         | 3                         | 6                         | 17        |
| # with 1nt deviation (PSE 1)        |         |                           |       |                           |        |                           |        | 6                         | 9                         | 9                         | 5         |
| # with 2nt deviation (PSE 2)        |         |                           |       |                           |        |                           |        | 5                         | 6                         | 3                         | 2         |
| # with 3nt deviation (PSE 3)        |         |                           |       |                           |        |                           |        | 2                         | 1                         | 3                         | 2         |
| # upto 3nt deviation/total sequence |         |                           |       |                           |        |                           |        | 21/30                     | 19/30                     | 21/30                     | 26/30     |



**Table S9:** Performance of Dicer cleavage site at 5p arm on independent dataset of 30 pre-miRNA sequences (**exclusive miRBase 14**) on *Model 2* (Table S5) trained on 555 positive and 18662 negative patterns using extended binary pattern feature. Top three predicted cleavages site were compared with the actual cleavage site and calculated the PSE value = (Act Pos- Pred Pos); PSE which is most close to actual cleavage site among three PSE is denoted as close PSE. PSE: position shift error, Act: actual, Pred: predicted.

| Sn                                  | Act Pos | 1 <sup>st</sup> Top score |        | 2 <sup>nd</sup> Top score |        | 3 <sup>rd</sup> Top Score |        | PSE (Act Pos- Pred Pos)   |                           |                           | Close PSE |
|-------------------------------------|---------|---------------------------|--------|---------------------------|--------|---------------------------|--------|---------------------------|---------------------------|---------------------------|-----------|
|                                     |         | Pos                       | score  | Pos                       | score  | Pos                       | Score  | 1 <sup>st</sup> Top score | 2 <sup>nd</sup> Top score | 3 <sup>rd</sup> Top Score |           |
| 1                                   | 28      | 30                        | 0.264  | 32                        | -0.636 | 20                        | -0.700 | 2                         | 4                         | -8                        | 2         |
| 2                                   | 31      | 33                        | 0.517  | 34                        | 0.366  | 32                        | 0.284  | 2                         | 3                         | 1                         | 1         |
| 3                                   | 31      | 31                        | 0.596  | 30                        | 0.132  | 32                        | -0.074 | 0                         | -1                        | 1                         | 0         |
| 4                                   | 47      | 46                        | 0.126  | 47                        | -0.043 | 48                        | -0.338 | -1                        | 0                         | 1                         | 0         |
| 5                                   | 43      | 47                        | -0.047 | 46                        | -0.277 | 41                        | -0.557 | 4                         | 3                         | -2                        | 2         |
| 6                                   | 31      | 36                        | -0.688 | 31                        | -0.741 | 35                        | -0.760 | 5                         | 0                         | 4                         | 0         |
| 7                                   | 34      | 38                        | 0.375  | 35                        | -0.452 | 37                        | -0.472 | 4                         | 1                         | 3                         | 1         |
| 8                                   | 29      | 36                        | 2.164  | 35                        | 0.844  | 27                        | -0.229 | 7                         | 6                         | -2                        | 2         |
| 9                                   | 38      | 38                        | -0.291 | 34                        | -0.661 | 35                        | -0.673 | 0                         | -4                        | -3                        | 0         |
| 10                                  | 42      | 44                        | 1.558  | 43                        | 0.834  | 40                        | 0.226  | 2                         | 1                         | -2                        | 1         |
| 11                                  | 32      | 39                        | 1.335  | 38                        | -0.172 | 28                        | -0.250 | 7                         | 6                         | -4                        | 4         |
| 12                                  | 40      | 40                        | -0.100 | 42                        | -0.148 | 39                        | -0.336 | 0                         | 2                         | -1                        | 0         |
| 13                                  | 41      | 42                        | 0.555  | 43                        | 0.420  | 44                        | 0.090  | 1                         | 2                         | 3                         | 1         |
| 14                                  | 35      | 35                        | 1.328  | 36                        | 1.066  | 37                        | 0.677  | 0                         | 1                         | 2                         | 0         |
| 15                                  | 35      | 36                        | 1.161  | 35                        | 0.919  | 37                        | 0.677  | 1                         | 0                         | 2                         | 0         |
| 16                                  | 29      | 48                        | 1.244  | 49                        | 1.094  | 47                        | 1.094  | 19                        | 20                        | 18                        | 19        |
| 17                                  | 39      | 43                        | 0.817  | 42                        | 0.432  | 46                        | 0.345  | 4                         | 3                         | 7                         | 3         |
| 18                                  | 32      | 32                        | -0.208 | 31                        | -0.621 | 33                        | -0.629 | 0                         | -1                        | 1                         | 0         |
| 19                                  | 32      | 29                        | -1.084 | 24                        | -1.285 | 30                        | -1.302 | -3                        | -8                        | -2                        | 2         |
| 20                                  | 45      | 43                        | 0.836  | 44                        | -0.111 | 40                        | -0.158 | -2                        | -1                        | -5                        | 1         |
| 21                                  | 28      | 24                        | -0.192 | 25                        | -0.251 | 26                        | -0.438 | -4                        | -3                        | -2                        | 2         |
| 22                                  | 35      | 36                        | -0.520 | 35                        | -0.885 | 39                        | -0.981 | 1                         | 0                         | 4                         | 0         |
| 23                                  | 32      | 40                        | 0.547  | 39                        | -0.117 | 38                        | -0.297 | 8                         | 7                         | 6                         | 6         |
| 24                                  | 34      | 35                        | 0.923  | 34                        | 0.434  | 33                        | -0.079 | 1                         | 0                         | -1                        | 0         |
| 25                                  | 42      | 41                        | 1.153  | 42                        | 0.870  | 40                        | 0.415  | -1                        | 0                         | -2                        | 0         |
| 26                                  | 34      | 36                        | 0.526  | 33                        | -0.387 | 34                        | -0.644 | 2                         | -1                        | 0                         | 0         |
| 27                                  | 35      | 35                        | 1.235  | 34                        | 0.012  | 33                        | -0.501 | 0                         | -1                        | -2                        | 0         |
| 28                                  | 37      | 39                        | -0.266 | 38                        | -0.337 | 40                        | -0.408 | 2                         | 1                         | 3                         | 1         |
| 29                                  | 40      | 41                        | 1.076  | 40                        | 0.203  | 37                        | -0.085 | 1                         | 0                         | -3                        | 0         |
| 30                                  | 37      | 44                        | -0.080 | 43                        | -0.481 | 40                        | -0.575 | 7                         | 6                         | 3                         | 3         |
| Average PSE                         |         |                           |        |                           |        |                           |        | 3.03                      | 2.87                      | 3.27                      | 1.7       |
| Average PSE (Excluding SN 18)       |         |                           |        |                           |        |                           |        | 2.48                      | 2.28                      | 2.76                      | 1.1       |
| # with actual position (PSE 0)      |         |                           |        |                           |        |                           |        | 6                         | 7                         | 1                         | 14        |
| # with 1nt deviation (PSE 1)        |         |                           |        |                           |        |                           |        | 7                         | 9                         | 6                         | 6         |
| # with 2nt deviation (PSE 2)        |         |                           |        |                           |        |                           |        | 6                         | 2                         | 9                         | 5         |
| # with 3nt deviation (PSE 3)        |         |                           |        |                           |        |                           |        | 1                         | 4                         | 6                         | 2         |
| # upto 3nt deviation/total sequence |         |                           |        |                           |        |                           |        | 20/30                     | 22/30                     | 22/30                     | 27/30     |
